# Supplementary material for: Microglia control vascular architecture via a TGFβ1 dependent paracrine mechanism linked to tissue mechanics
Source: PubMed Central journal article supplement (PMC7033106; doi:10.1038/s41467-020-14787-y), 2020-02-20
Supplement: 41467_2020_14787_MOESM1_ESM.pdf [file 41467_2020_14787_MOESM1_ESM.pdf]

## **Supplementary Information**

Microglia control vascular architecture via a TGF $\beta$ 1 dependent paracrine mechanism linked to tissue mechanics

Dudiki et al.

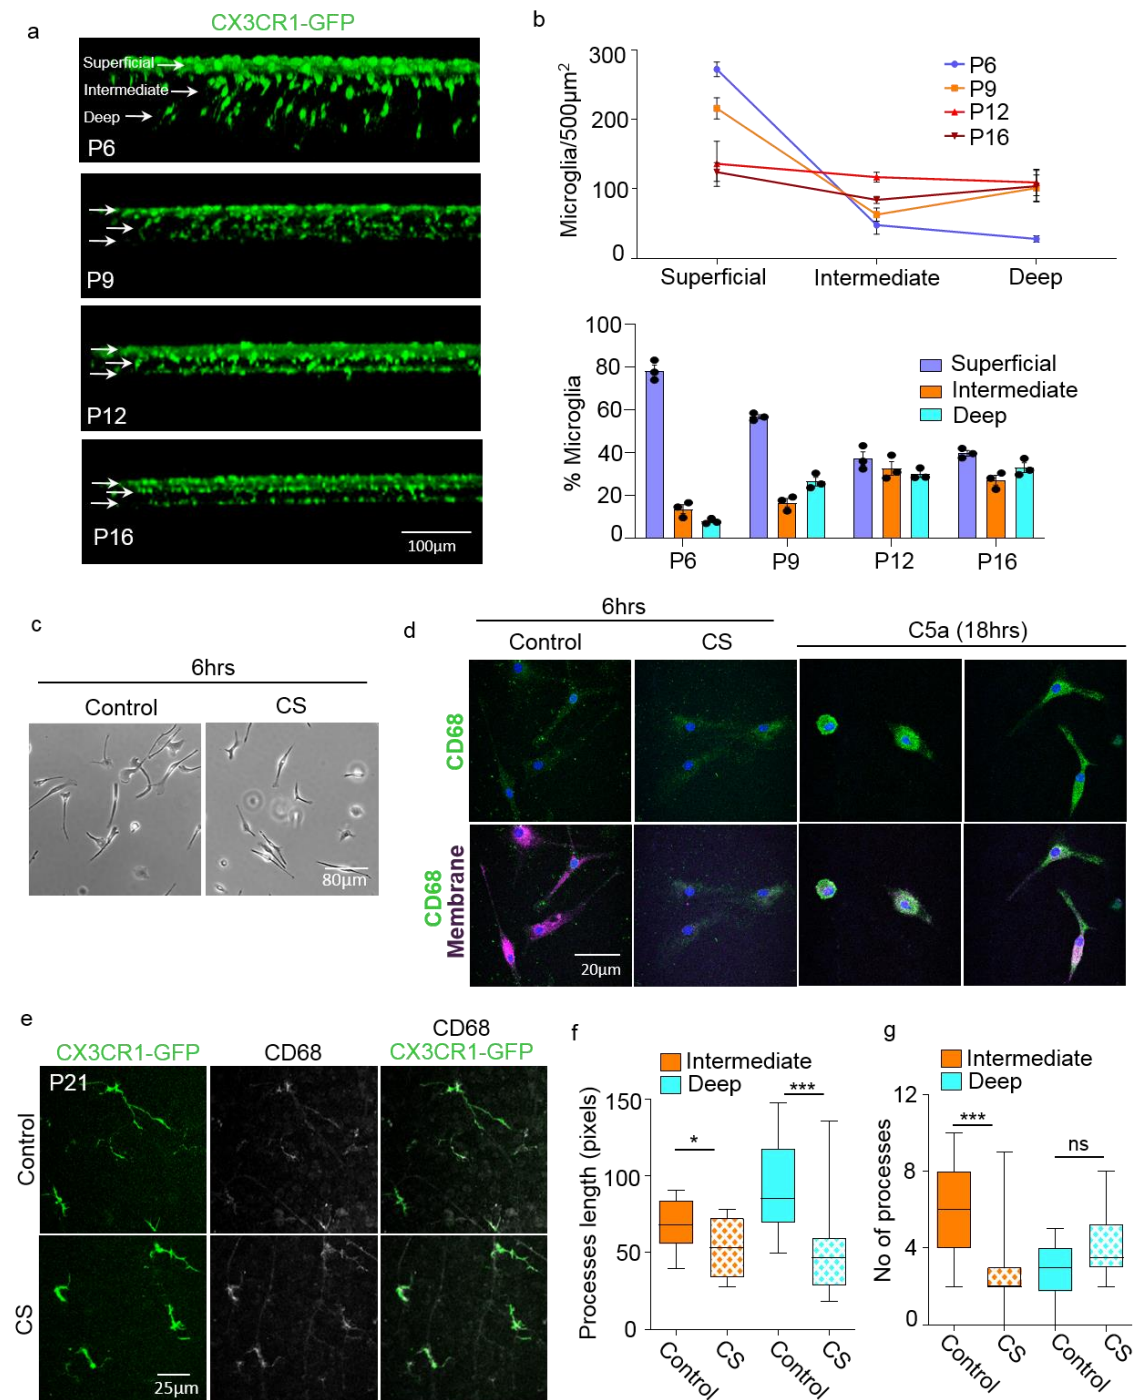

**Supplementary Figure 1. Microglial migration in retinal development and response to tissue softening with chondroitin sulfate.**

**a.** Confocal images of whole-mount retinas from ages P6 to P16 showing chronological population of deeper retinal layers by CX3CR1-GFP microglia during postnatal retinal development. Note the elongated shape of microglia extending from the superficial layer indicative of migrating microglia at P6. **b.** Quantification of microglial numbers in each retinal layer at different ages shown as a line graph (data represented as mean and error bars are standard deviation (SD)) and bar graphs (data represented as mean and error bars are standard error of mean (SEM)) simultaneously (N=3 mice). At P6, almost all microglia are observed in the superficial layer. By P12, the microglia are distributed evenly among all the layers. **c.** Representative phase contrast images from three experiments depicting the morphology of WT microglia cultured in the presence of 20mg/ml CS or vehicle for 6hrs. Microglia treated with CS appear spread and polarized similar to WT, indicative of resting state. **d.** Representative confocal images of cultured WT microglia stained with CD68 (green), DAPI (blue) and WGA membrane marker (magenta). Microglia were treated with 20mg/ml CS or vehicle alone (control) for 6hrs or with complement protein C5a (known to activate microglia) for 18hrs. Representative images from two independent experiments are shown. **e.** Representative phase contrast images of WT P21 whole mount retinas treated with 20mg/ml CS for up to 6hrs followed by staining with CD68 (gray) (N=3 mice). CS treatment did not increase the expression of microglial activation marker CD68. **f,g.** Comparison of microglia morphologies in the intermediate and deep layers of 6hrs CS treated and control retinas; major processes length ( $P=0.0149$  (\*),  $P<0.0001$  (\*\*\*) ; N=16 (intermediate) and 24 (deep) cells from 3 mice) and number of processes ( $P<0.0001$  (\*\*\*) ; N=18 (intermediate) and 14 (deep) cells from 3 mice). Statistical significance was calculated using two-tailed *t*-test. Center line of box plots represent the median, bound of box show 25th to 75th percentiles, and upper and lower bounds of whiskers represent the maximum and minimum values, respectively.

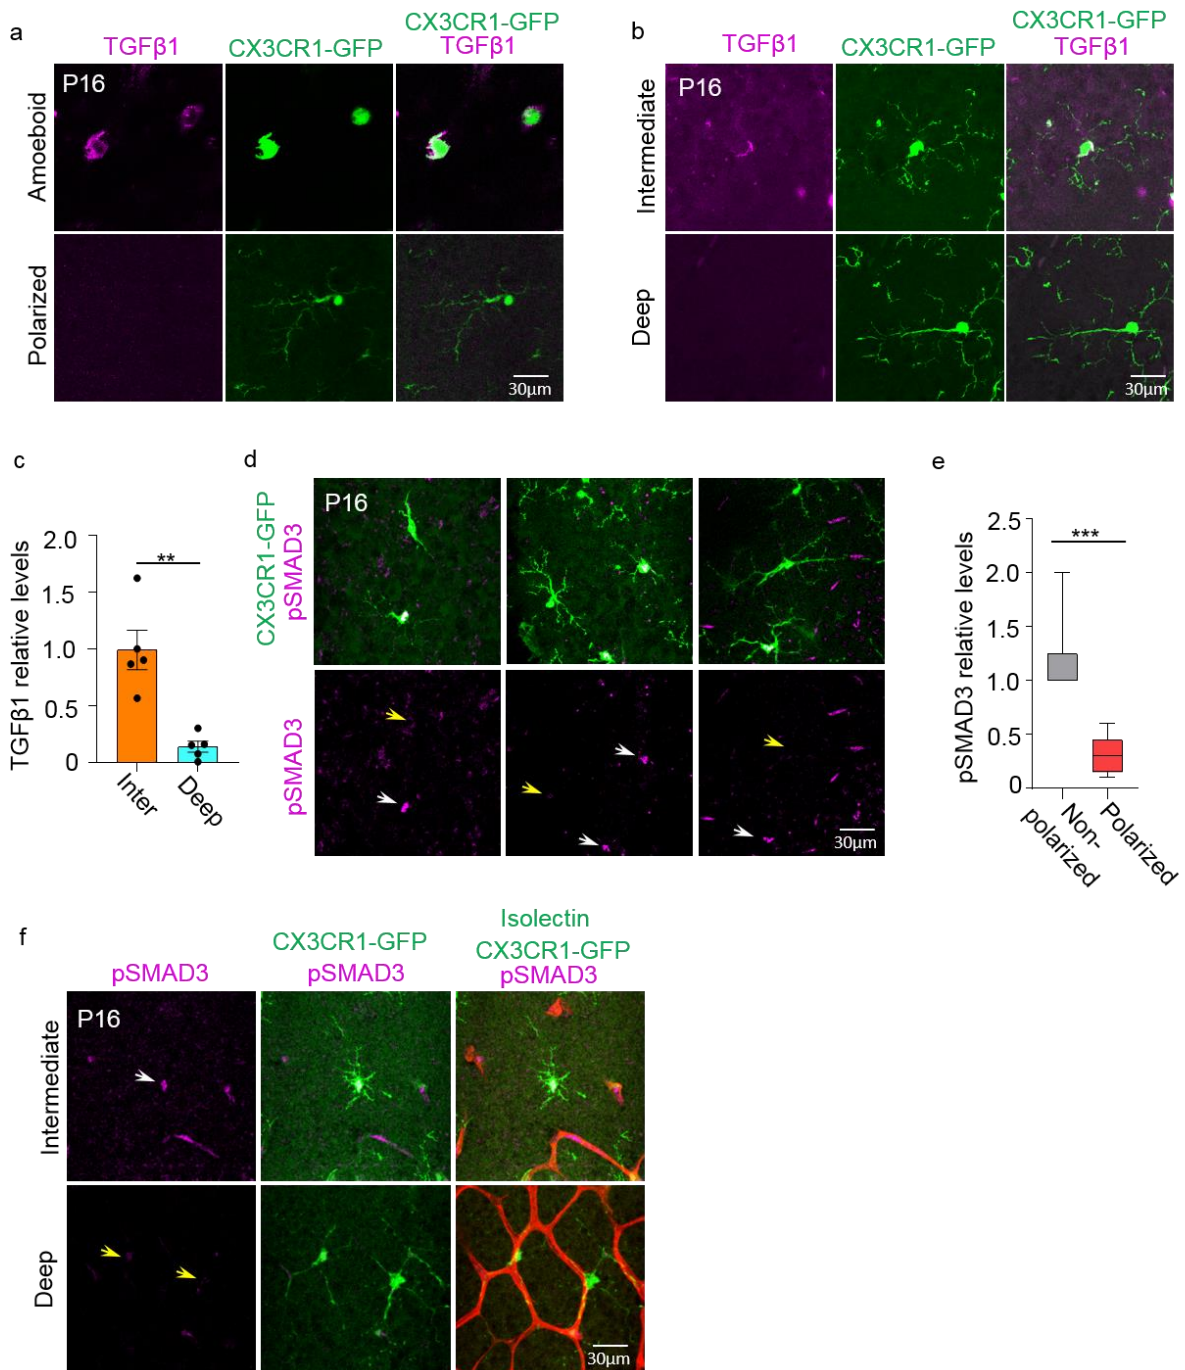

**Supplementary Figure 2. TGFβ1 regulation by microglia in P16 retina.** **a.** Representative confocal images from five mice showing high levels of TGFβ1 expression in amoeboid/non-polarized vs polarized microglia in retina. **b.** Ramified/non-polarized microglia of softer intermediate layer expresses substantially more TGFβ1 compared to deep microglia polarized on stiff ONL. **c.** Relative TGFβ1 levels in microglia of intermediate and deep layer (two-tailed *t*-test;  $P=0.0015$  (\*\*);  $N=5$  mice). **d.** Three representative confocal images of pSMAD3 levels in non-polarized (white arrow heads) and polarized (yellow arrow heads) microglia. **e.** Quantification of relative pSMAD3 levels in non-polarized and polarized microglia (two-tailed *t*-test;  $P<0.0001$  (\*\*\*) ;  $N=9$  cells per group from three mice). **f.** The ramified/non-polarized microglia of the softer intermediate layer show higher pSMAD3 localization to nucleus (white arrow head) compared to deep microglia (yellow arrow heads) polarized on the stiff ONL of retina. A representative image of 4 mice is shown. All bar graphs are represented as mean and error bars are SEM. Center line of box plots represent the median, bound of box show 25th to 75th percentiles, and upper and lower bounds of whiskers represent the maximum and minimum values, respectively.

Supplementary figure 3

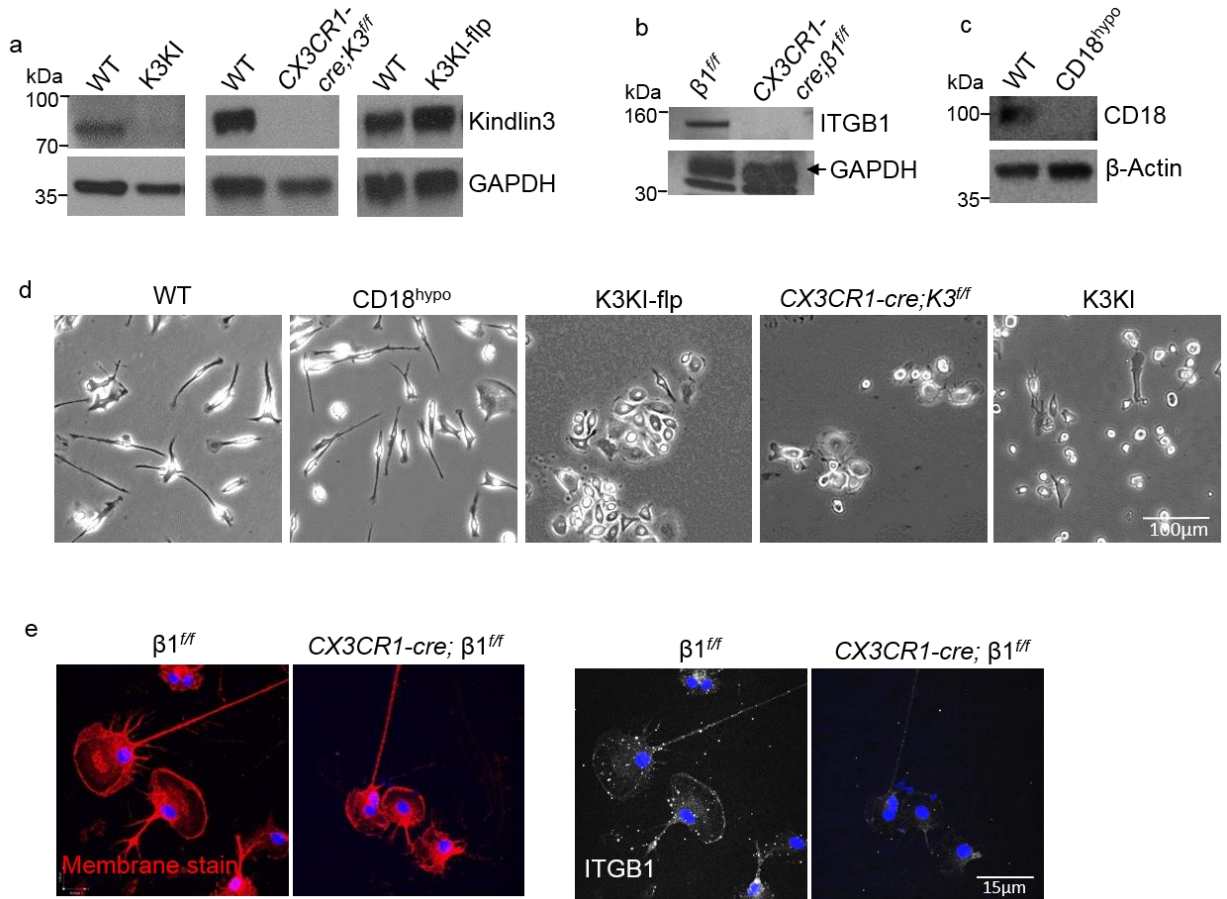

**Supplementary Figure 3. Kindlin3 in microglia morphology.** **a-c.** Western blot analysis of primary microglia or bone marrow-derived macrophages (BMDM) for the expression of K3, ITGB1, and CD18, respectively. Primary microglia and BMDM were pooled from four and two mice respectively per genotype and analyzed. Images from two experiments are shown. **d.** Phase-contrast images of primary microglia isolated from integrin and K3-deficient mouse models spread overnight on fibronectin-coated plates. Representative of five experiments. **e.** Primary microglia isolated from  $\beta 1$ -integrin knockout mice (CX3CR1-cre;  $\beta 1^{fl/fl}$ ) and control  $\beta 1^{fl/fl}$  stained for  $\beta 1$ -integrin (ITGB1) after spreading on fibronectin (N=3).



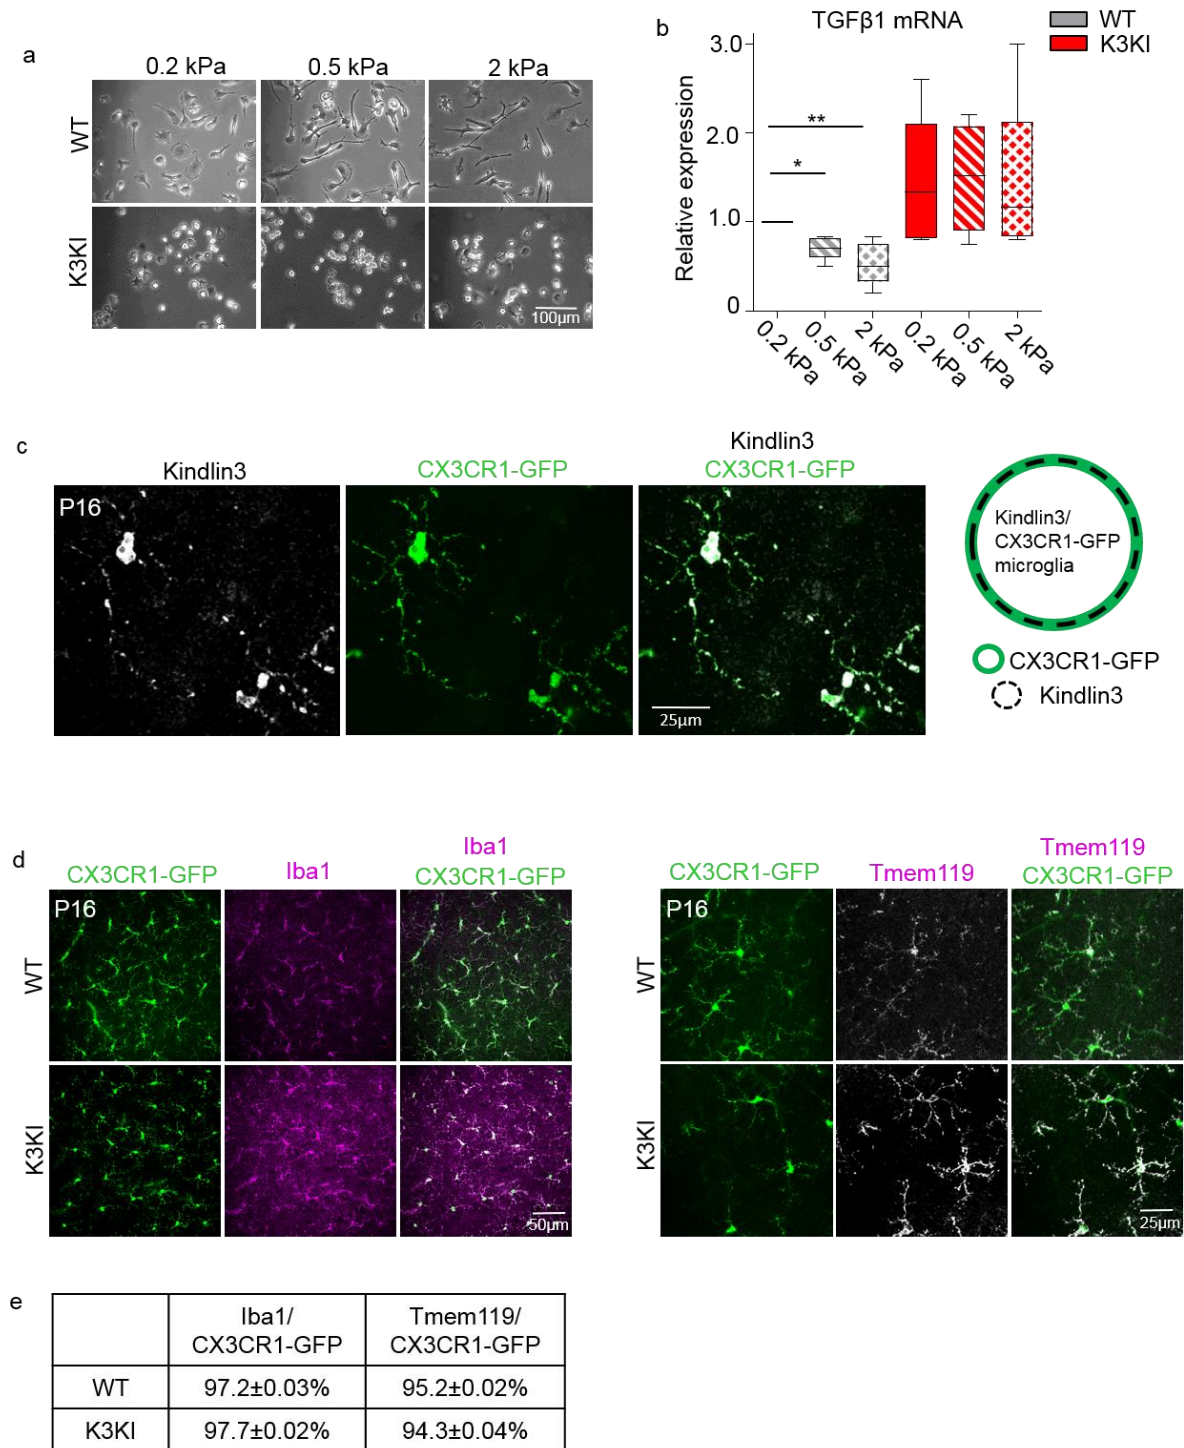

**Supplementary Figure 4. Microglia-specific Kindlin3 is essential for microglial mechanosensing function.** **a.** Representative phase-contrast images of WT and K3KI microglial cells on fibronectin-coated silicone gels of 0.2, 0.5, and 2kPa stiffness (N=5 experiments). **b.** QPCR analysis showing opposite correlation of microglial TGFβ1 mRNA levels with substrate stiffness. No changes were observed in K3KI microglia. Center line of box plots represent the median, bound of box show 25th to 75th percentiles, and upper and lower bounds of whiskers represent the maximum and minimum values, respectively (one-way ANOVA with Dunnett's post-hoc analyses;  $P = 0.0222$  (\*),  $P = 0.0009$  (\*\*); N=5 experiments). **c.** Confocal images of whole-mount P16 retinas with CX3CR1-GFP microglia immunostained for K3. K3 exhibits 100% co-localization with CX3CR1-GFP as shown by the Venn diagram. **d.** Confocal images of whole-mount P16 retinas with CX3CR1-GFP microglia co-stained for Iba-1 and Tmem-119. **e.** Quantification of CX3CR1-GFP cells expressing Iba1 and Tmem119 in P16 WT and K3KI retinas. All values are mean and error bars are SEM, N=3 mice. ~98% and 95% of CX3CR1-GFP cells are positive for Iba-1 and Tmem119 respectively in each genotype.

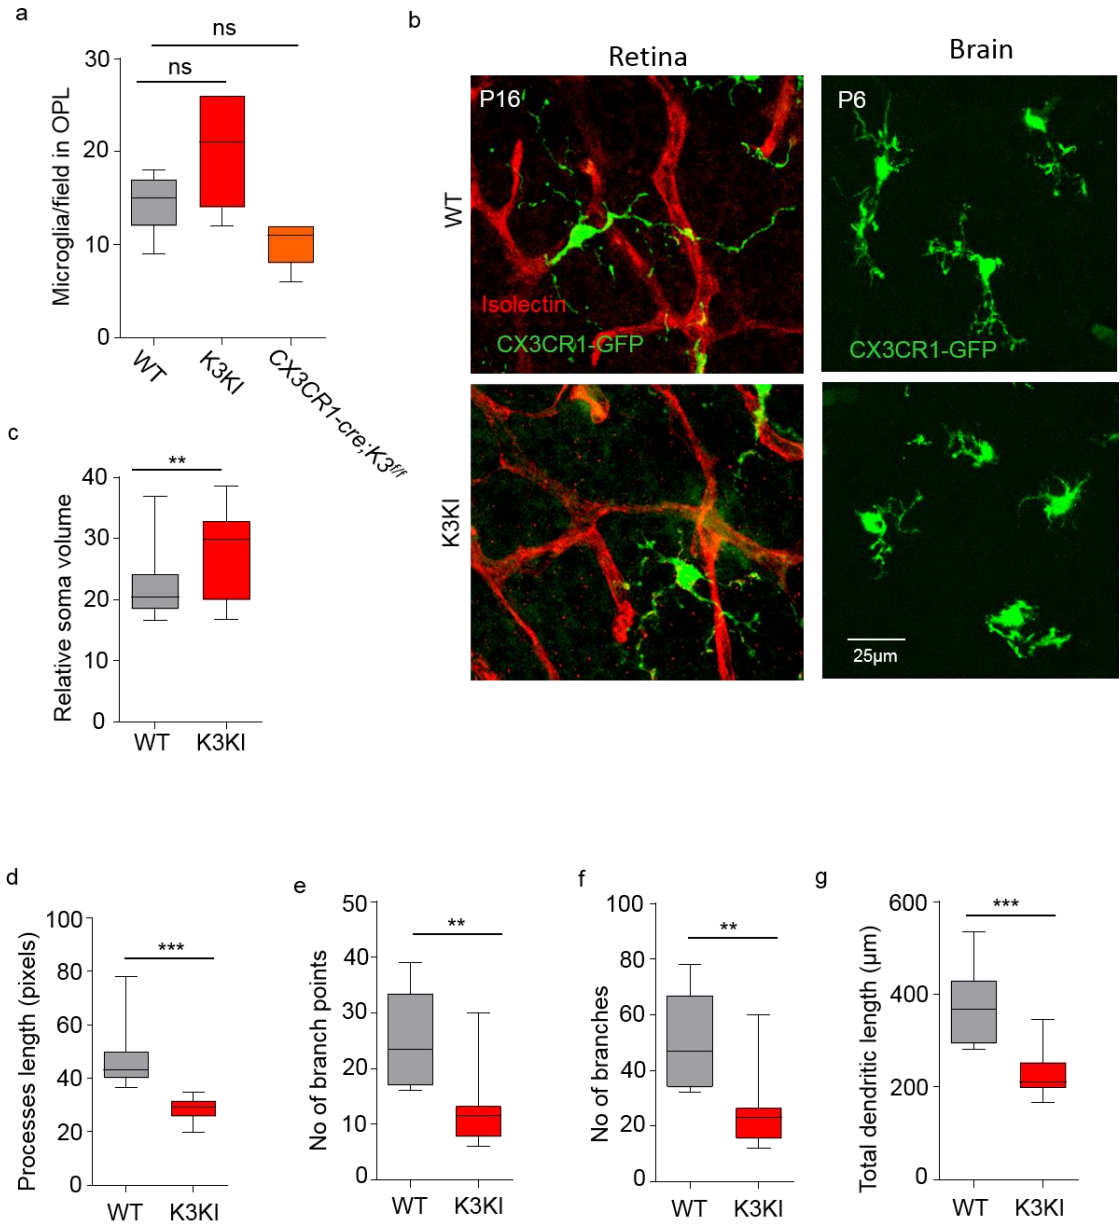

**Supplementary Figure 5. Morphological characterization of K3KI microglia.** **a.** Comparison of microglial numbers in the deep layer of WT, K3KI, and K3KO (*CX3CR1-cre;K3<sup>fl</sup>*) retinas (one-way ANOVA with Dunnett's post-hoc;  $P_{WT-K3KI}=0.0663$  (ns),  $P_{WT-K3KO}=0.1320$ ; N=3 mice per group). K3KI at P16 showed a small increase in microglial numbers. However, complete knockout of K3 in *CX3CR1-cre;K3<sup>fl</sup>* showed a decrease at P16, likely indicating an indirect consequence of K3 deficiency on microglial numbers. **b.** Confocal images of CX3CR1-GFP microglia in retina and brain. **c-g.** Comparison of the WT and K3KI microglial morphologies; volume of cell soma ( $P_{0.0032}$  (\*\*); N=22 cells from 3 mice) major processes length ( $P_{<0.0001}$  (\*\*\*) N=22 cells from 3 mice), number of branch points ( $P_{0.0015}$  (\*\*); N=10 cells from 3 mice), number of branches ( $P_{0.0015}$  (\*\*); N=10 cells from 3 mice), and total dendritic length ( $P_{0.0002}$  (\*\*\*) N=10 cells from 3 mice). Statistical significance were calculated using two-tailed *t*-test. Center line of box plots represent the median, bound of box show 25th to 75th percentiles, and upper and lower bounds of whiskers represent the maximum and minimum values, respectively.

a K3KI vs WT whole retinas 140 genes

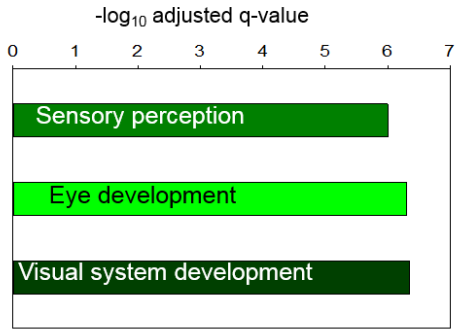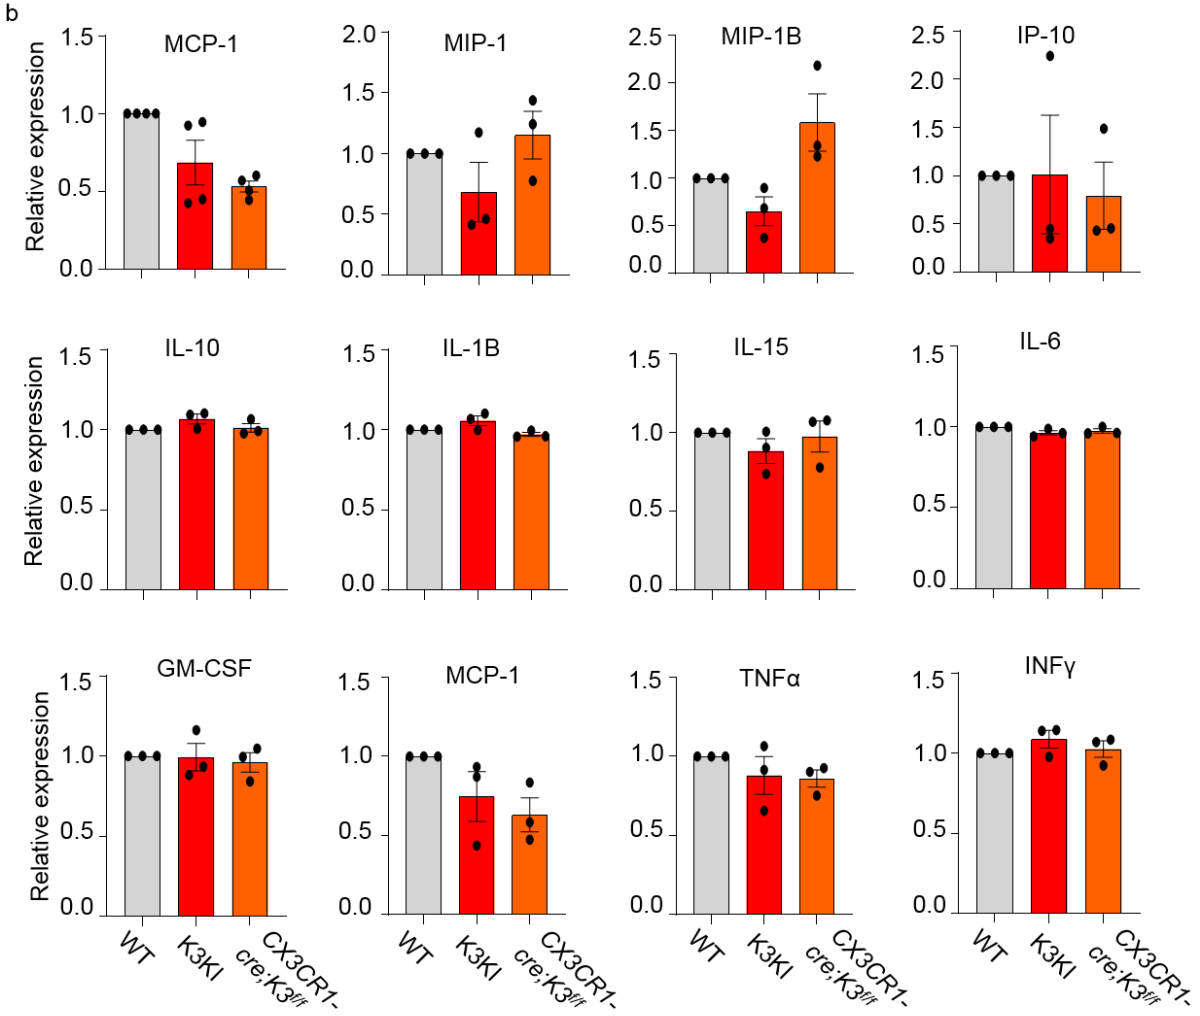

**Supplementary Figure 6. Gene and protein expression arrays of microglia.** **a.** Graph summarizing the pathways overrepresented in RNA expression arrays of *CX3CR1-cre;K3<sup>fl</sup>* and control 14 day old retinas (N=3 mice per group). The list of genes with significant changes (with  $p < 0.05$ ) was analyzed by ConsensusPathDB at <http://cpdb.molgen.mpg.de/> according to the protocol by Herwig *et al.* for over-representation analysis of gene sets. From the resulting analysis top 3 overrepresented pathways (based on q-values calculated by ConsensusPathDB) are shown in the graph. A total of 140 genes, from sensory perception to eye development, were significantly altered. The list of these genes are provided in the source data file. **b.** Results of ELISA-based UPLEX assays for cytokine levels in microglial cell lysates from WT, K3KO, K3KI, and K3KI-flp mice (N= 3 biological replicates), respectively. All bar graphs are represented as mean and error bars are SEM.

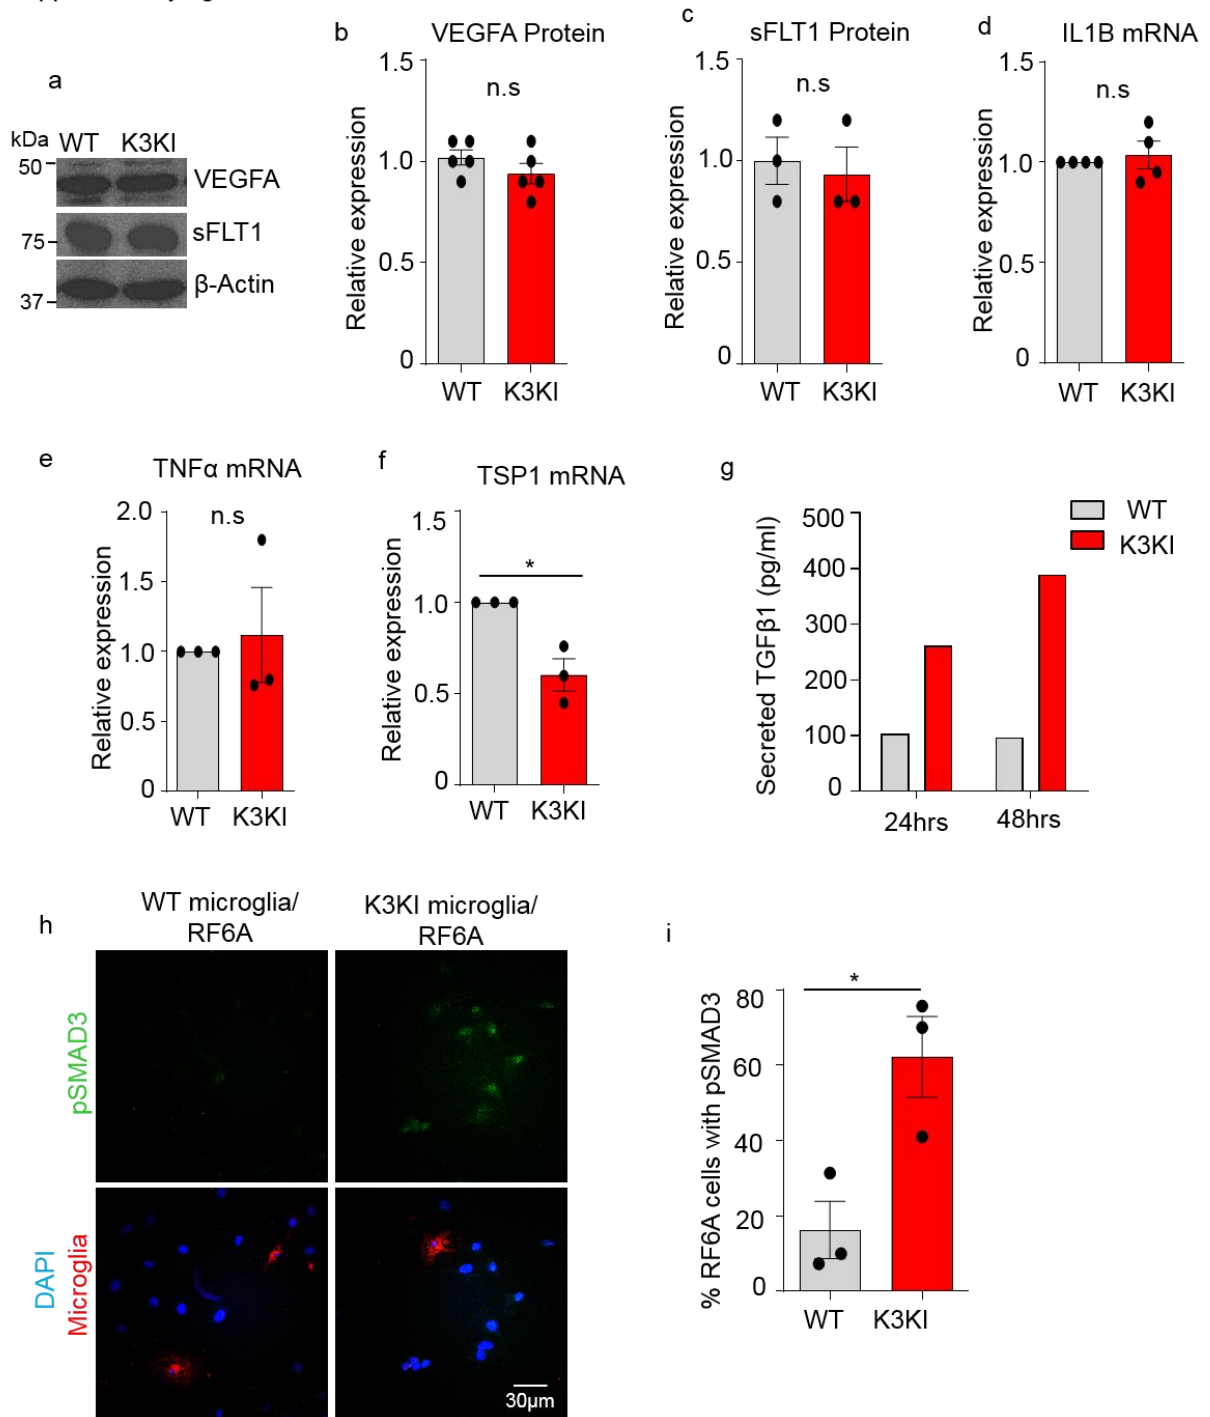

**Supplementary Figure 7. Analysis of growth factors and cytokines production by K3KI microglia in comparison to WT.** **a.** A representative western blot of WT and K3KI retinas from five mice for VEGFA and soluble-FLT1 (sFLT1). **b,c.** Densitometry quantification of sFLT and VEGFA levels (two-tailed *t*-test;  $P_{\text{VEGFA}}=0.2415$  (ns);  $N=5$  mice) and sFLT1 (two-tailed *t*-test;  $P_{\text{sFLT1}}=0.7247$  (ns);  $N=3$  mice) from western blot analysis. **d-f.** QPCR analysis of microglia from WT and K3KI mice for IL-1B ( $P_{\text{IL1B}}=0.6056$  (ns);  $N=4$  experiments), TNF $\alpha$  ( $P_{\text{TNF}\alpha}=0.7421$  (ns);  $N=3$  experiments), and TSP1 mRNA levels ( $P_{\text{TSP1}}=0.0114$  (\*);  $N=3$  experiments). Microglia for each experiment were pooled from four mice. **g.** High levels of latent TGF $\beta$ 1 secreted by K3KI primary microglia into serum-free media at 24 hr and 48 hr as compared to WT microglia were assessed by ELISA. Microglia were pooled from four mice and a representative bar graph out of two experiments is shown. **h.** Confocal images of RF6A endothelial cells immunostained for pSMAD3. RF6A cells were co-cultured with WT and K3KI microglia in serum-free media for 24 hrs. Cells were then fixed and stained with the microglia-specific marker Iba1 (red), DAPI for all cell nuclei, and pSMAD3 (green). RF6A cells co-cultured with K3KI microglia showed higher pSMAD3 levels, representative of three experiments. **i.** Relative quantification of RF6A cells showing high pSMAD3 levels ( $P_{\text{RF6A}}=0.0251$  (\*);  $N=3$  experiments). Statistical significance was calculated using two-tailed *t*-test. All bar graphs are represented as mean and error bars are SEM.



Supplementary figure 8

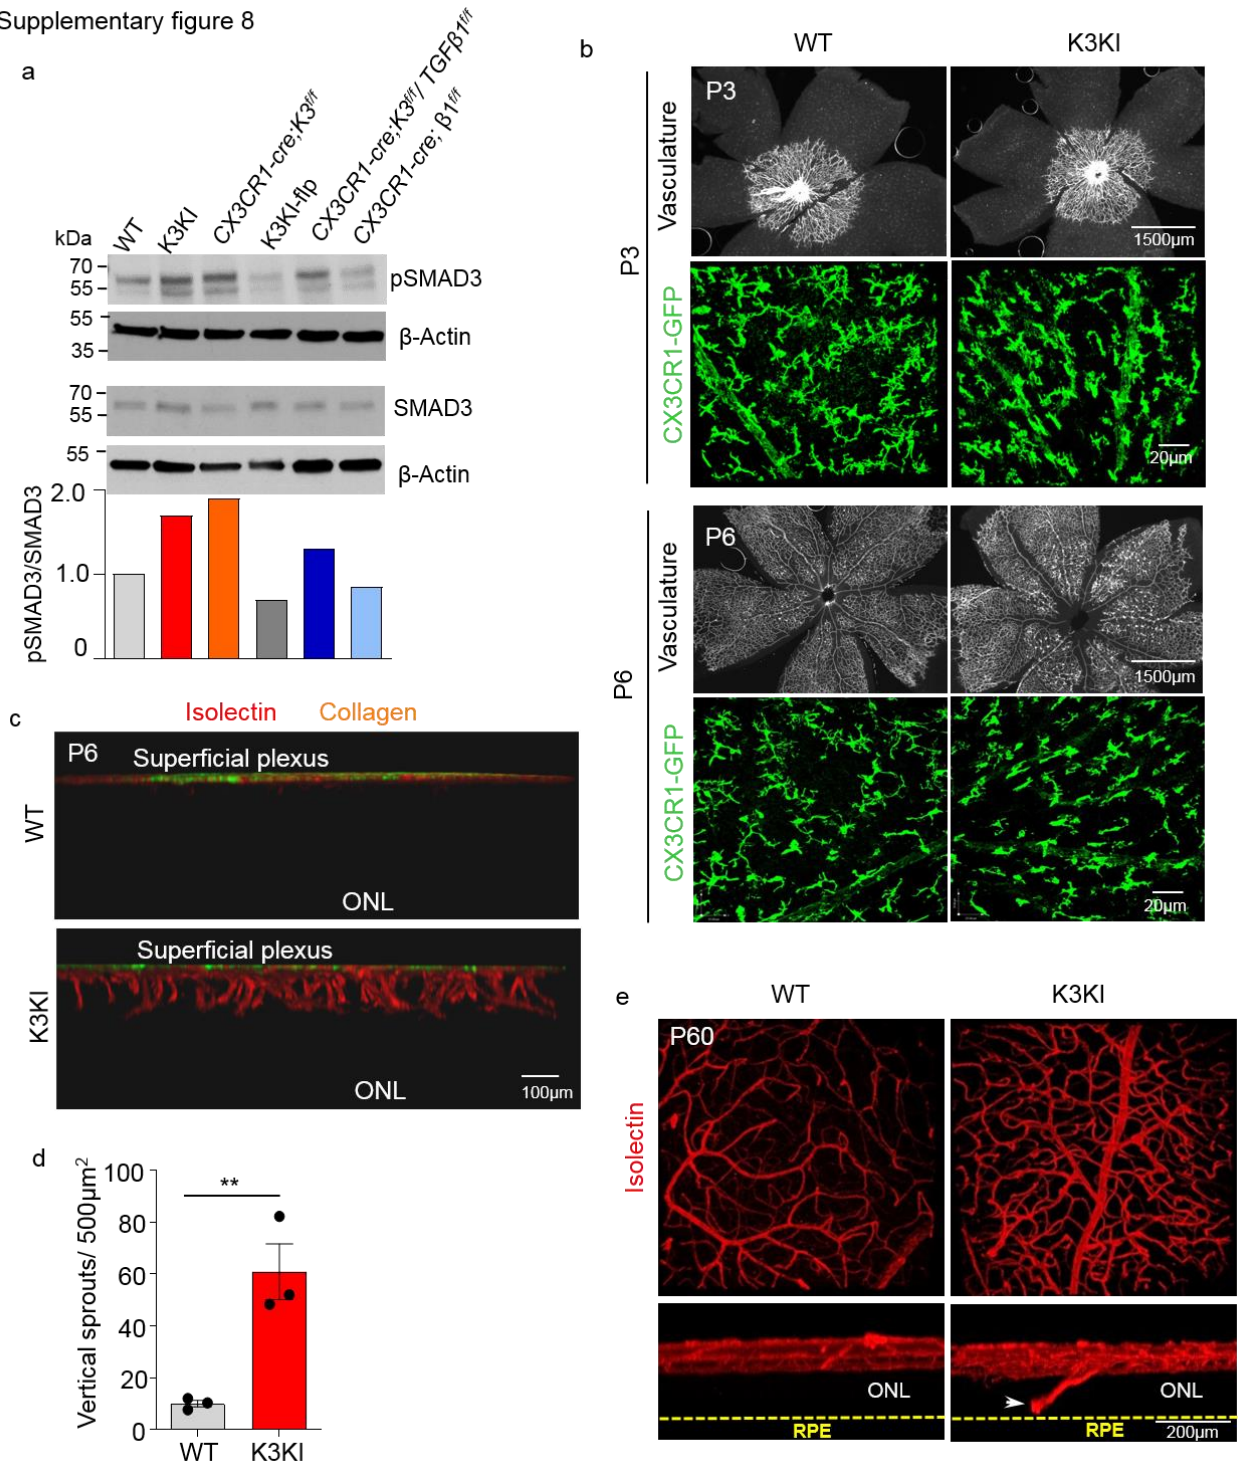

**Supplementary Figure 8. High levels of TGFβ1 causes premature vascular sprouting and maturation in K3KI retinas.**

**a.** Western blots showing high pSMAD3 levels in K3KI and K3KO (*CX3CR1-cre;K3<sup>fl</sup>*) retinas as compared to WT. Retinas from three mice were pooled and two identical western blots were run and probed with antibodies for pSMAD3 and Smad3, followed by beta-actin for loading control. The pSMAD3/Smad3 levels for the shown western blot were determined after adjusting SMAD3 levels to the actin levels. The K3KI and K3KO retinas show increased pSMAD3 levels compared to WT. At the same time, K3KI-flp knock-in lacking integrin interaction was similar to WT. A significant reduction in pSmad3/Smad3 levels was observed for Kindlin3/TGFβ1 conditional double knockout (*CX3CR1-cre;K3<sup>fl</sup>/TGFβ1<sup>fl</sup>*) retinas, indicating efficient deletion of microglial TGFβ1. pSMAD3 levels in β1 microglia-specific KO were similar to those in WT.

**b.** Whole-mount retinas at P3 and P6 immunostained with isolectin to show vasculature (white) and microglia expressing CX3CR1-GFP. **c.** 3D reconstitution of whole-mount P6 retina stained with isolectin and collagen showing a cross-sectional view of the vascular layers. Kindlin3-deficient retinas showed premature formation of vertical neo-vascular sprouts from the superficial vascular plexus toward the deeper layers of retina. **d.** Quantitation of the number vertical neo-vascular sprouts per field is shown on the right (two-tailed *t*-test;  $P=0.0093$  (\*\*);  $N=3$  mice). The bar graph represents mean and error bars are SEM. **e.** 3D reconstituted confocal images of P60 retinas stained with isolectin. Only one out of the six K3KI mice analyzed showed sub-retinal vascular lesions (indicated by white arrowheads) originating from the deep vascular plexus and resting on the RPE layer (indicated by the yellow line).

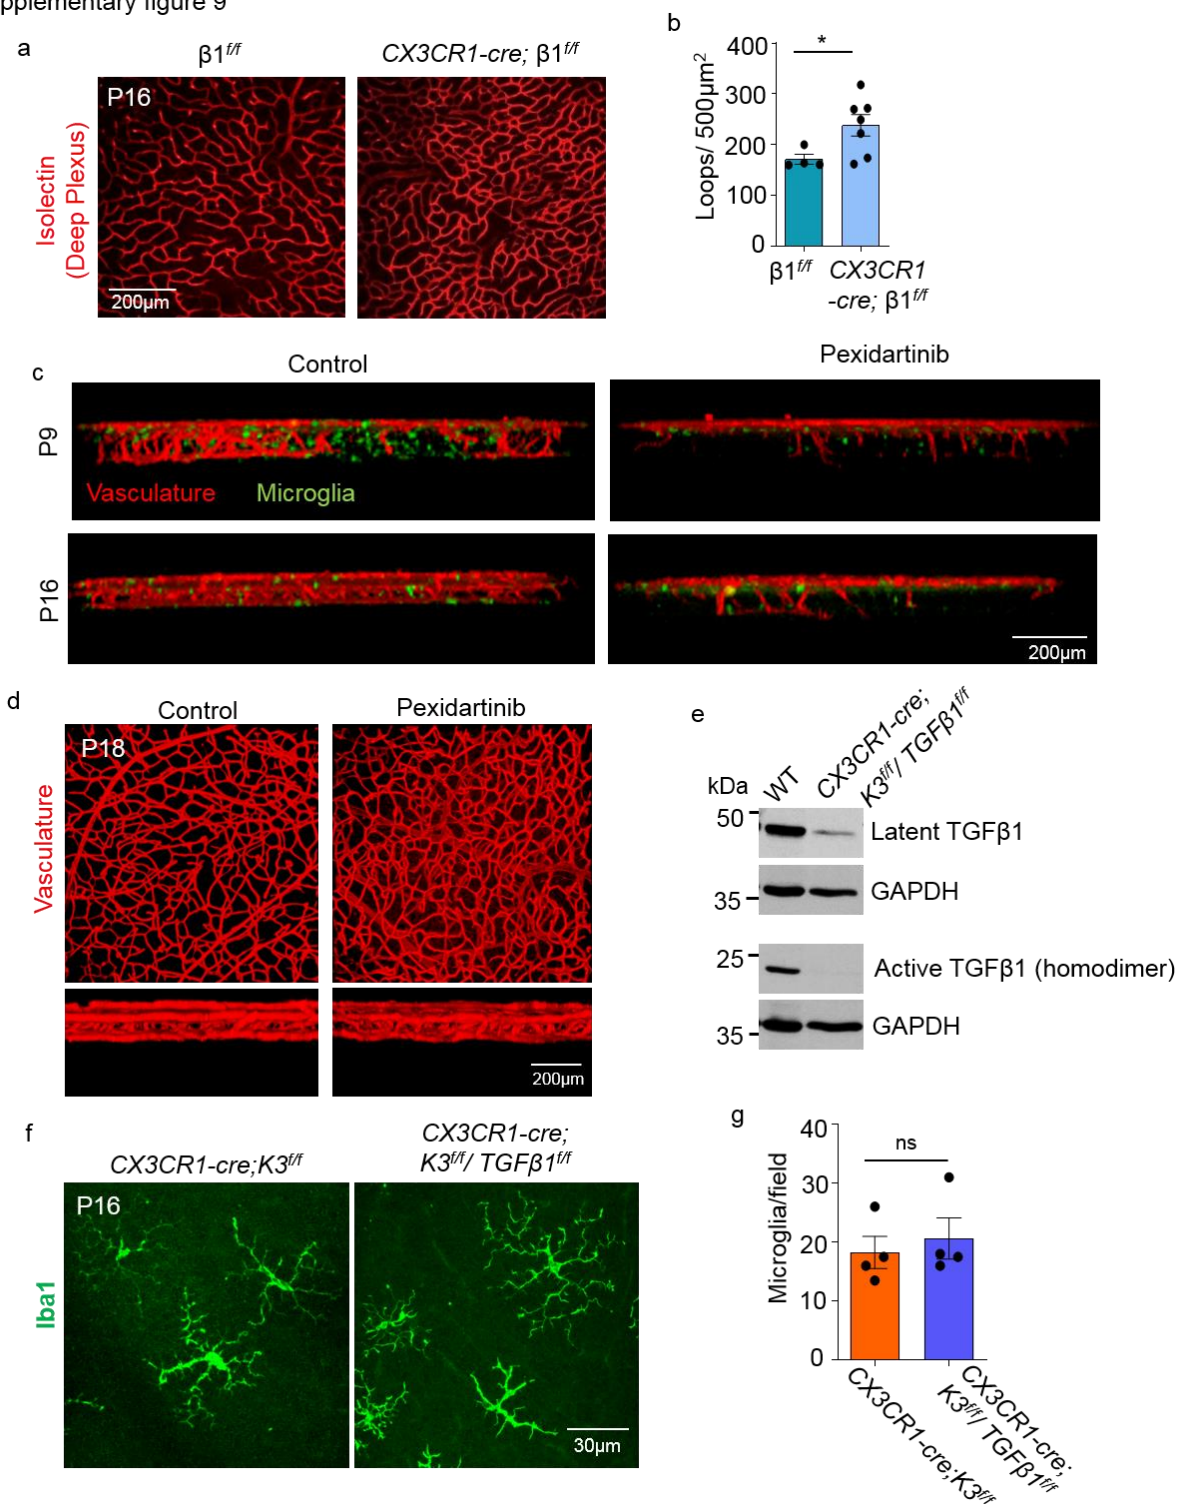

**Supplementary Figure 9. Microglia are crucial for retinal vascular development.** **a.** Confocal image of deep vascular plexus from whole-mount retinas of  $\beta 1$  KO ( $CX3CR1\text{-cre}; \beta 1^{f/f}$ ) and control ( $\beta 1^{f/f}$ ) mice stained with isolectin. **b.** Bar graphs representing the average loop numbers and loop area of blood vessels in the deep vascular plexus (two-tailed  $t$ -test;  $P=0.0496$  (\*);  $N=4 \beta 1^{f/f}$  and  $7 \beta 1$  KO mice). **c.** Microglia depletion with pexidartinib treatment in mice was initiated at P2 and ended at P9 or P16 prior to retinal isolation. 3D reconstitution of whole-mount retinas from P9 and P16 mice treated with pexidartinib or vehicle alone (control). A lateral view is shown to visualize the three vascular plexi (superficial, intermediate, and deep) in red and CX3CR1-GFP-expressing microglia (green). **d.** Pexidartinib treatment in mice starting at P9 and ending at P18 prior to retinal isolation. 3D reconstitution of whole-mount retina from P18 mice treated with pexidartinib or vehicle alone (control). A superimposed and lateral view of the vascular plexi representative of three mice are shown. At P18, the lack of microglia resulted in a modest increase in vascular density. **e.** Western blot showing successful knock out of TGF $\beta 1$  from bone marrow-derived macrophages after tamoxifen treatment to  $CX3CR1\text{-cre}; K3^{f/f}/TGF\beta 1^{f/f}$  mice. A representative of three mice of each genotype analyzed is shown. **f.** Confocal images representing the morphology of Iba1-immunostained microglia in the retinas of  $CX3CR1\text{-cre}; K3^{f/f}$  and  $CX3CR1\text{-cre}; K3^{f/f}/TGF\beta 1^{f/f}$  mice. Representative images from four mice are shown. **g.** Quantification of microglial numbers microglia in the deep layers of retinas from  $CX3CR1\text{-cre}; K3^{f/f}$  and  $CX3CR1\text{-cre}; K3^{f/f}/TGF\beta 1^{f/f}$  mice. No significant difference was observed with two-tailed  $t$ -test;  $P=0.6100$  (ns);  $N=4$  mice). All bar graphs are represented as mean and error bars are SEM.

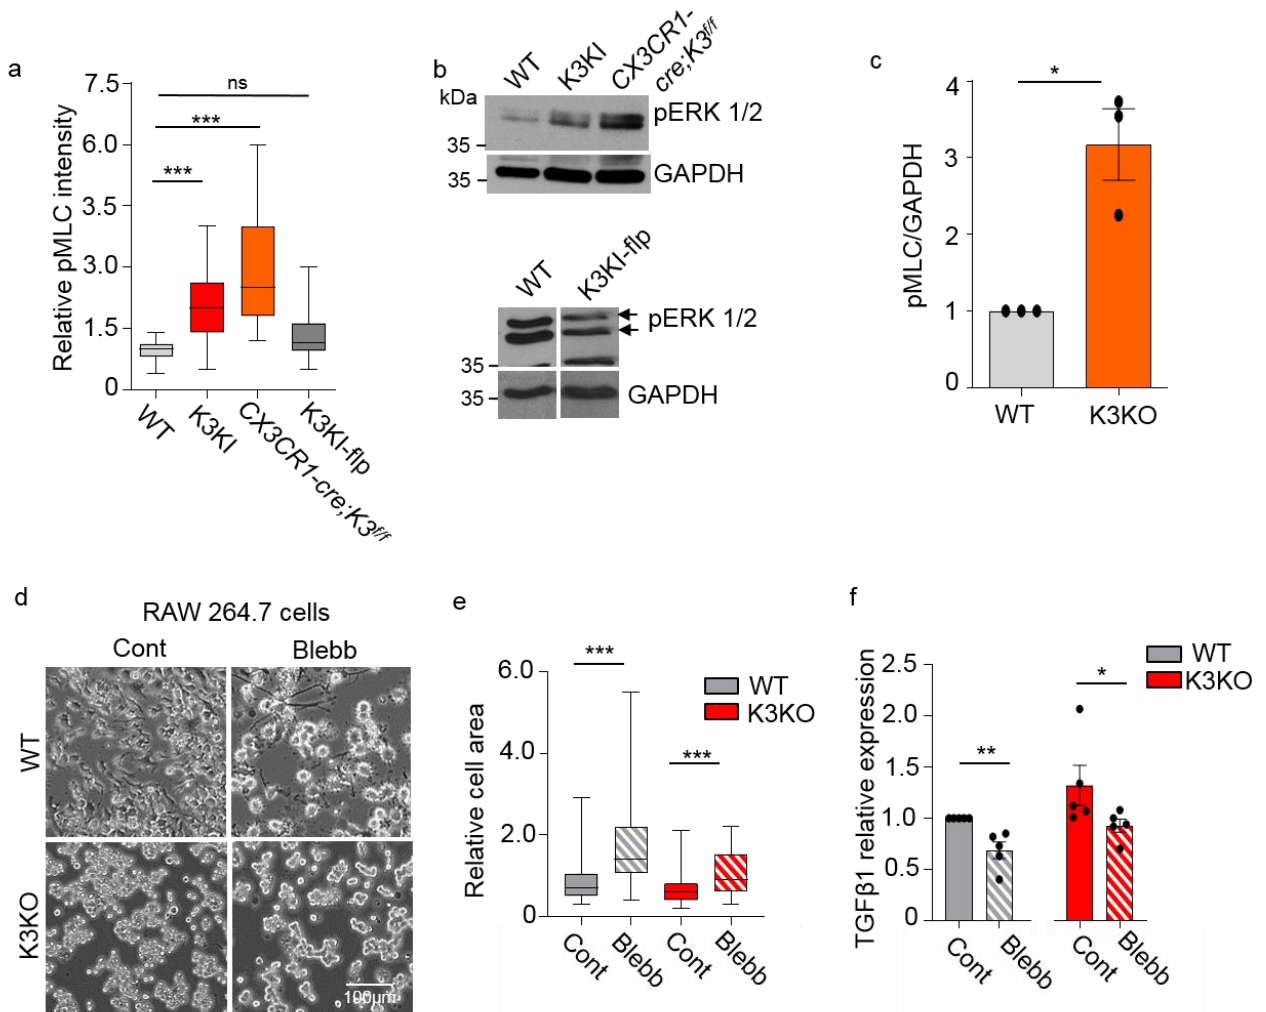

**Supplementary Figure 10. Kindlin3 deficiency leads to increased pMLC and pERK.** **a.** Quantification of pMLC levels in WT, K3-deficient (K3KI and *CX3CR1-cre;K3<sup>fl/fl</sup>*), and K3 mutant (K3KI-flp) immunostained microglia. Significantly higher levels of pMLC were observed only with K3 deficiency (one-way ANOVA with Dunnett's post-hoc;  $P < 0.0001$  (\*\*\*) ,  $P = 0.1922$  (ns);  $N = 30$  cells per group from three experiments). **b.** Western blot analysis of whole retinas showing increased pERK1/2 levels in K3-deficient, but not K3 mutant (K3KI-flp), mice. GAPDH was used as a loading control. **c.** Quantification of immunoreactive bands from western blot analysis showing high pMLC levels in the two clones of K3KO RAW cells compared to WT after normalization to GAPDH (two-tailed  $t$ -test;  $P = 0.0214$  (\*),  $N = 3$  experiments). **d.** Phase-contrast image of K3KO RAW cells treated with DMSO (control) or 50 μM blebbistatin (Blebb) and spread on fibronectin-coated plates for 12 hrs. Representative of three experiments. **e.** Bar graph shows cell spread area relative to WT control (two-tailed  $t$ -test;  $P < 0.0001$  (\*\*\*) ;  $N = 78$  cells per group from three experiments) **f.** QPCR analysis for TGFB1 in control vs. blebbistatin-treated RAW cells (one-tailed  $t$ -test;  $P = 0.00090$  (\*\*),  $P = 0.0493$  (\*\*);  $N = 5$  experiments). Center line of box plots represent the median, bound of box show 25th to 75th percentiles, and upper and lower bounds of whiskers represent the maximum and minimum values, respectively. All bar graphs are represented as mean and error bars are SEM.

## Supplementary Methods

**Table 1. Key resources used in the study**

| Reagent                                 | Company                         | Catalog #         | Notes                                                                                                                                                            |
|-----------------------------------------|---------------------------------|-------------------|------------------------------------------------------------------------------------------------------------------------------------------------------------------|
| C57BL/6                                 | Jackson Laboratory              | 000664            | Mouse                                                                                                                                                            |
| Cx3cr1 <sup>GFP/GFP</sup>               | Jackson Laboratory              | 5582              | Mouse                                                                                                                                                            |
| Cx3cr1-cre<br>(inducible)               | Jackson laboratory              | 21160             | Mouse                                                                                                                                                            |
| TGF $\beta$ 1 <sup>flox/flox</sup>      | Jackson Laboratory              | 010721            | Mouse                                                                                                                                                            |
| Integrin $\beta$ 1 <sup>flox/flox</sup> | Jackson Laboratory              | 4605              | Mouse                                                                                                                                                            |
| CD18 hypomorph                          | Jackson Laboratory              | 2128              | Mouse                                                                                                                                                            |
| Tamoxifen Powder                        | Sigma-Aldrich                   | T5648             |                                                                                                                                                                  |
| Chondroitin Sulfate                     | Selleck Chemicals               | S2416             |                                                                                                                                                                  |
| PFA                                     | Electron Microscope<br>Sciences | 15713             |                                                                                                                                                                  |
| Triton 100X                             | Bio-Rad                         | 161-0407          |                                                                                                                                                                  |
| Sucrose                                 | Sigma-Aldrich                   | S9378             |                                                                                                                                                                  |
| 4-hydroxytamoxifen<br>(4HT)             | Sigma-Aldrich                   | SML1666           |                                                                                                                                                                  |
| Corn oil                                | Sigma-Aldrich                   | C8267             |                                                                                                                                                                  |
| 5% nonfat dry milk                      | Cell Signaling                  | 9999s             |                                                                                                                                                                  |
| DMEM/F12                                |                                 | CCF Media<br>core | DMEM:F12 ( 15mM<br>HEPES, L- glut                                                                                                                                |
| Microglia media                         |                                 |                   | DMEM/F12 with 20% FBS,<br>100 u/ml penicillin and<br>streptomycin, 0.25ug/ml<br>amphotericin B and<br>supplementation of non-<br>essential amino acids<br>(NEAA) |
| Penicillin/streptomycin<br>(100 u/ml)   |                                 | CCF Media<br>core |                                                                                                                                                                  |
| Amphotericin B                          |                                 | CCF Media<br>core |                                                                                                                                                                  |
| Non-essential amino<br>acids (NEAA)     | Thermo Fisher<br>Scientific     | 242572            |                                                                                                                                                                  |
| Blocking solution                       |                                 |                   | 5% goat serum, 3% BSA in<br>1x PBS                                                                                                                               |

|                                      |                              |                                      |                                                                            |
|--------------------------------------|------------------------------|--------------------------------------|----------------------------------------------------------------------------|
| RIPA Buffer                          | Thermo Fisher Scientific     | 89900                                | RIPA lysis and extraction buffer                                           |
| Fetal Bovine Serum (FBS)             | Atlanta Biologicals          | S11150H                              |                                                                            |
| Goat serum                           | Fisher Scientific            | ICN2939249                           |                                                                            |
| Bovine Serum Albumin (BSA)           | Fisher Scientific            | BP-1600-100                          |                                                                            |
| 4x Laemmli Buffer                    | Bio-Rad                      | 1610747                              |                                                                            |
| Nanodrop spectrometer                | Nanodrop technologies        | ND-1000                              |                                                                            |
| Mini-Protean II system               | Bio-Rad                      |                                      |                                                                            |
| Confocal microscope                  | Leica                        | SP5 confocal/multi-photon microscope |                                                                            |
| Cryotome                             | Leica                        | CM1850                               |                                                                            |
| Inverted optical microscope          | Nikon                        | Eclipse Ti- TR 400                   |                                                                            |
| Anti-TGFB1                           | Torrey Pines Biolabs         | TP-254                               | Purified Rabbit Anti-porcine TGFβ1                                         |
| TMEM119                              | Abcam                        | ab209064                             | Rabbit monoclonal Anti-TMEM119 antibody [28-3] - Microglial marker         |
| α Tubulin                            | Santa Cruz                   | sc 8035                              | Mouse Monoclonal IgM (kappa light chain)                                   |
| pSMAD3                               | Abcam                        | Ab52903                              | Rabbit monoclonal Anti-Smad3 (phospho S423 + S425) antibody [EP823Y]       |
| SMAD3                                | Cell Signalling Technologies | 9513s                                | SMAD3 antibody                                                             |
| Iba-1                                | Wako Chemicals USA           | 019-19741                            | Anti Iba1, Rabbit Polyclonal (for Immunocytochemistry)                     |
| CD68                                 | Abcam                        | Ab31630                              | Anti-CD68 antibody [ED1]                                                   |
| pMLC                                 | Cell Signaling Technologies  | 3671S                                | Rabbit Polyclonal anti-p-myosin Light chain                                |
| pERK1                                | Cell Signaling Technologies  | 9101S                                | Rabbit Polyclonal anti-Phospho-p44/42 MAPK (Erk1/2) Thr202/Tyr204 Antibody |
| Actin                                | Cell Signaling               | 4967S                                | Rabbit Polyclonal anti-□□Actin antibody                                    |
| Phospho-Myosin Light Chain 2 (Ser19) | Cell Signaling               | 3671                                 | Rabbit Polyclonal anti-Phospho-Myosin Light Chain 2 (Ser19) Antibody       |



|                                                                                      |                             |                             |                                                                                                                              |
|--------------------------------------------------------------------------------------|-----------------------------|-----------------------------|------------------------------------------------------------------------------------------------------------------------------|
| Alexa Fluor® 568 Phalloidin                                                          | Thermo Fisher Scientific    | A12380                      | High-affinity F-actin probe conjugated to our superior Alexa Fluor® 568 dye                                                  |
| Wheat Germ Agglutinin (WGA) Alexa Fluor 647 conjugate                                | Thermo Fisher Scientific    | W32466                      | Alexa Fluor® 647 WGA for labeling of <i>N</i> -acetylglucosaminyl and sialic acid residues of glycoproteins on cell surfaces |
| Isolectin GS-IB4, 568                                                                | I21412                      | ThermoFisher Scientific     | The red fluorescent Alexa Fluor® 568 isolectin GS-IB4 conjugate used for specifically labeling endothelial cells             |
| Goat anti-Rabbit IgG (H+L) Cross-Adsorbed Secondary Antibody, Alexa Fluor 488        | A-11008                     | ThermoFisher Scientific     | Goat Polyclonal Secondary Antibody                                                                                           |
| Goat anti-Rabbit IgG (H+L) Highly Cross-Adsorbed Secondary Antibody, Alexa Fluor 647 | A-21245                     | ThermoFisher Scientific     | Goat Polyclonal Secondary Antibody                                                                                           |
| Goat anti-Rabbit IgG (H+L) Cross-Adsorbed Secondary Antibody, Alexa Fluor 568        | A-11001                     | ThermoFisher Scientific     | Goat Polyclonal Secondary Antibody                                                                                           |
| Goat anti-Mouse IgG (H+L) Cross-Adsorbed Secondary Antibody, Alexa Fluor 568         | A-11004                     | ThermoFisher Scientific     | Goat Polyclonal Secondary Antibody                                                                                           |
| Goat anti-Mouse IgG (H+L) Cross-Adsorbed Secondary Antibody, Alexa Fluor 488         | A-11011                     | Thermofisher Scientific     | Goat Polyclonal Secondary Antibody                                                                                           |
| Anti-rabbit IgG, HRP-linked Antibody                                                 | 7074S                       | Cell Signaling Technology   | HRP-linked secondary antibody                                                                                                |
| Anti-mouse IgG, HRP-linked Antibody                                                  | 7076S                       | Cell Signaling Technology   | HRP-linked secondary antibody                                                                                                |
| TGFB1 Forward Primer                                                                 | Integrated DNA Technologies | 5'GCGGACTACTATGCTA AAGAGG3' | Real-Time PCR (qPCR)                                                                                                         |
| TGFB1 Reverse Primer                                                                 | Integrated DNA Technologies | 5'GTTGCTCCACACTTGAT TTT3'   | Real-Time PCR (qPCR)                                                                                                         |

|                             |                              |                                          |                      |
|-----------------------------|------------------------------|------------------------------------------|----------------------|
| GAPDH Forward Primer        | Integrated DNA Technologies  | 5'ACTCCCAC<br>TCTTCCACC<br>TTC3'         | Real-Time PCR (qPCR) |
| GAPDH Reverse Primer        | Integrated DNA Technologies  | 5'TCCAGGG<br>TTTCTTACT<br>CCTTG3'        | Real-Time PCR (qPCR) |
| IL-1B Forward Primer        | Integrated DNA Technologies  | 5'ACGGACC<br>CCAAAAGA<br>TGAAG3'         | Real-Time PCR (qPCR) |
| Il-1B Reverse Primer        | Integrated DNA Technologies  | 5'CACGGGA<br>AAGACACA<br>GGTAG3'         | Real-Time PCR (qPCR) |
| TNF $\alpha$ Forward Primer | Integrated DNA Technologies  | 5'TGGAGTC<br>ATTGCTCTG<br>TGAAG3'        | Real-Time PCR (qPCR) |
| TNF $\alpha$ Reverse Primer | Integrated DNA Technologies  | 5'CCTGAGC<br>CATAATCCC<br>CTTTC3'        | Real-Time PCR (qPCR) |
| TSP1 Forward Primer         | Integrated DNA Technologies  | 5'GCAGACA<br>CAGACAAA<br>AACGGGGA<br>G3' | Real-Time PCR (qPCR) |
| TSP1 Reverse Primer         | Integrated DNA Technologies  | 5'TCTCCAAC<br>CCCATCCAT<br>GTCC3'        | Real-Time PCR (qPCR) |
| sgRNA ; K3KO Forward        | Integrated DNA Technologies  | CACCGACG<br>GGGGAGTC<br>GCACATTGG        |                      |
| sgRNA ; K3KO Reverse        | Integrated DNA Technologies  | AAACCCAAT<br>GTGCG<br>ACTCCCCCG<br>TC    |                      |
| sgRNA ; K3KO2 Forward       | Integrated DNA Technologies  | CACCGACA<br>GACGTGTGC<br>TGCGGCTT        |                      |
| sgRNA ; K3KO2 Reverse       | Integrated DNA Technologies  | AAAC<br>AAGCCGCA<br>GC<br>AACGTCTGT<br>C |                      |
| Volocity software           | PerkinElmer                  |                                          |                      |
| FIJI Image J software       | National Institute of Health | Version 1.51K                            |                      |
| ImagePro plus software      | Media Cybernetics            |                                          |                      |
| Quant studio 3              | Applied Biosystems           |                                          |                      |
| ABI SDS v2.1                | Applied Biosystems           |                                          |                      |

|                                    |                             |            |                                                                                         |
|------------------------------------|-----------------------------|------------|-----------------------------------------------------------------------------------------|
| 12% polyacrylamide slab gel        | Bio-Rad                     | 4561046    | 12% Mini-PROTEAN® TGX™ Precast Protein Gels, 15-well, 15 µl                             |
| Immunobilon-P PVDF membrane        | Millipore                   | 123988     | Membrane, PVDF, 0.45 µm, 26.5 cm x 3.75 m roll                                          |
| OCT                                | Fisher Scientific           | 23-730-571 | Tissue-Plus O.C.T. Compound                                                             |
| Protease inhibitor cocktail        | Roche                       | 5892970001 | complete™ ULTRA Tablets, Mini, EASYpack Protease Inhibitor Cocktail                     |
| mirQury RNA isolation kit          | Exiqon (discontinued)       | 181241     |                                                                                         |
| RT-PCR kit                         | Qiagen                      | 205111     | Omniscript RT kit                                                                       |
| Random Hexamers                    | Fisher Scientific           | N8080127   |                                                                                         |
| iQ SYBR Green super mix            | BioRad                      | 1708882    |                                                                                         |
| Signalfire ECL kit                 | Cell signaling Technologies | 6883S      |                                                                                         |
| Prolong Gold Antifade Mountant     | Thermo Fisher Scientific    | P36930     |                                                                                         |
| Hoechst                            | Invetrogen                  | H3570      | Nuclear staining                                                                        |
| Vectashield Mounting medium w/DAPI | Vector                      | 2E0327     | w/DAPI (for Nuclear staining)                                                           |
| TGFB1 Emax immune assay system     | Promega                     | G7590      |                                                                                         |
| LentiCRISPRv2 vector               | Addgene                     |            |                                                                                         |
| BsmBI                              | Fermentas                   |            |                                                                                         |
| Pheonix Packaging Cells            | Takara                      |            |                                                                                         |
| Lipofectamine3000                  | Thermo Fisher Scientific    | L3000008   |                                                                                         |
| Lenti-X Packaging Single Shots     | Clontech                    |            |                                                                                         |
| Puromycin                          | Santa Cruz                  | Sc-108071  | Puromycin dihydrochloride                                                               |
| Plvx-Dsred-monomer-c1 vector       | Clontech                    | 632153     |                                                                                         |
| T4 ligase                          | NEB                         | M0202S     |                                                                                         |
| Raw 264.7                          | ATCC                        |            | Macrophage-like, Abelson leukemia virus transformed cell line derived from BALB/c mice. |
